# Supplementary material for: Novel core–shell structure microspheres based on lanthanide complexes for white-light emission and fluorescence sensing
Source: Royal Society of Chemistry journal article supplement (doi:10.1039/c5dt03939h), 2016-01-01
Supplement: c5dt03939h1.pdf [file c5dt03939h1.pdf]

# Supporting Information

**Novel core-shell structure microspheres based on lanthanide complexes for white light emission and fluorescence sensing**

Xiao Lian, Bing Yan\*

Department of Chemistry, Tongji University, Siping Road 1239, Shanghai 200092, China

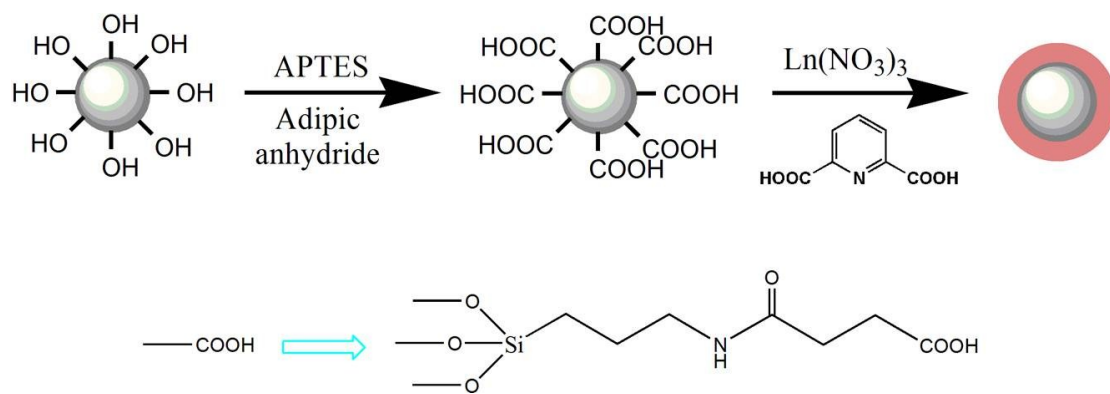

Fig. S1 The synthesis process of **SiO<sub>2</sub>@Ln-dpa**.

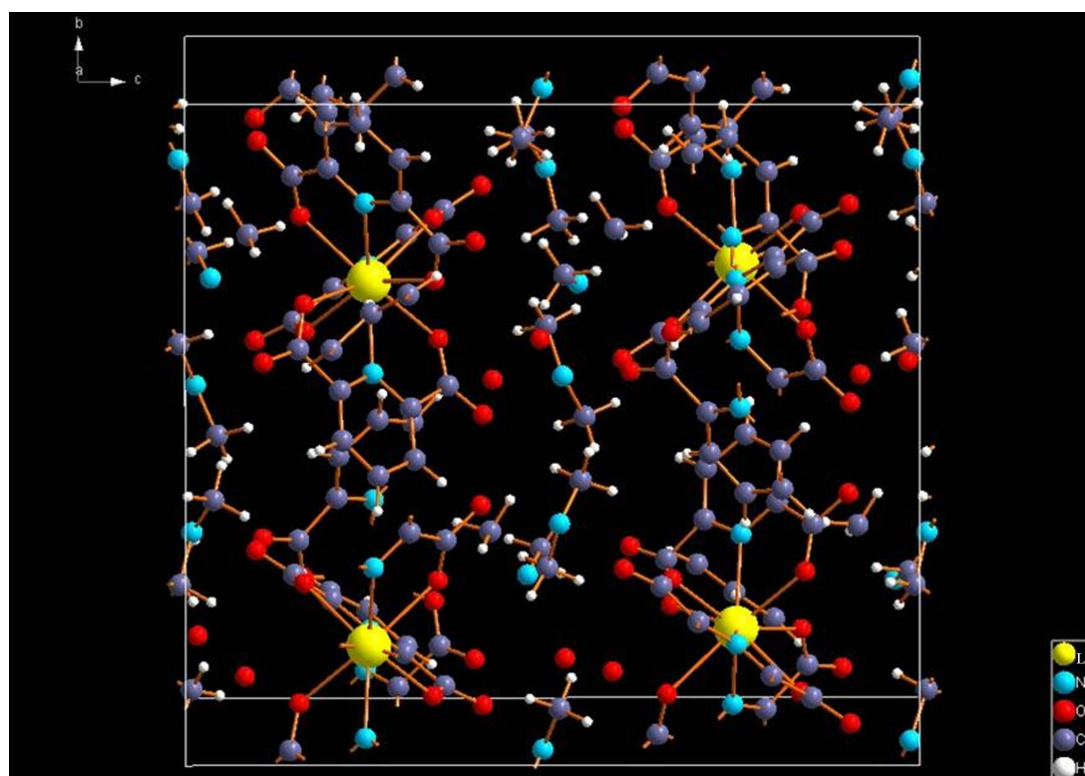

Scheme S1. The structure and typical coordination environment of  $[\text{H}_2\text{NMe}_2]_3[\text{Ln}(\text{dpa})_3]$ .

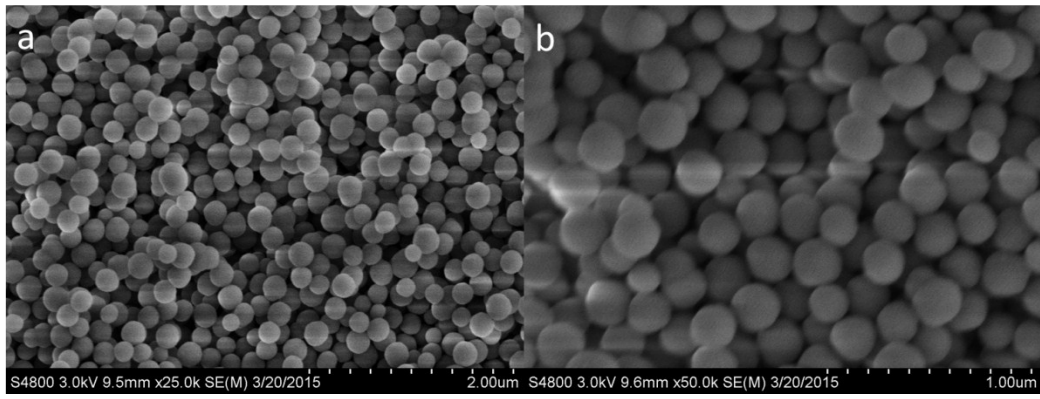

Fig. S2 The selected SEM images of silica microspheres.

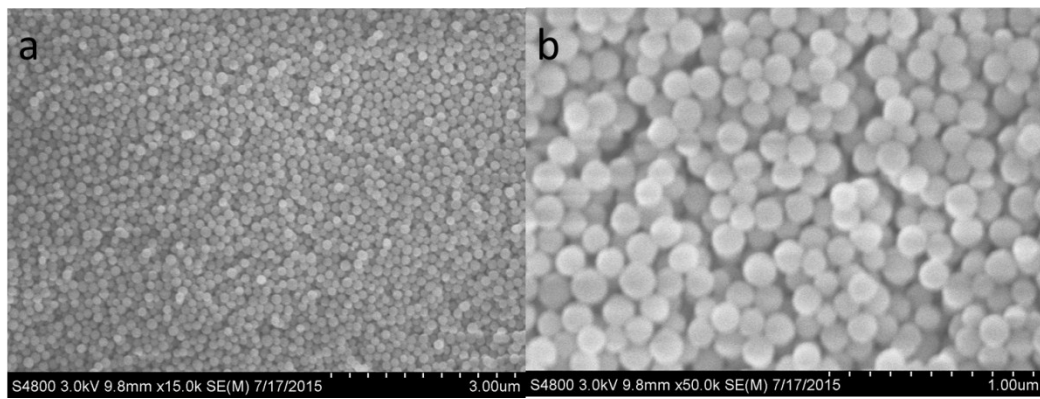

Fig. S3 The selected SEM images of  $\text{SiO}_2@Ln\text{-dpa}$ .

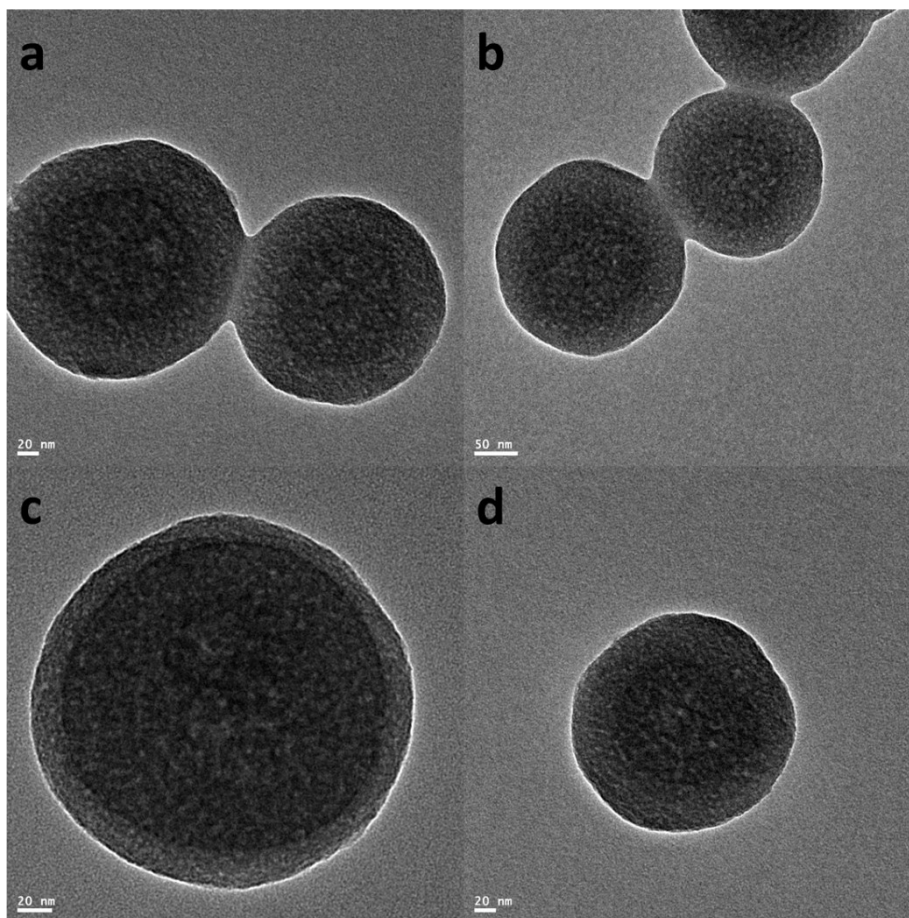

Fig. S4 The selected TEM images of  $\text{SiO}_2@Ln\text{-dpa}$ .

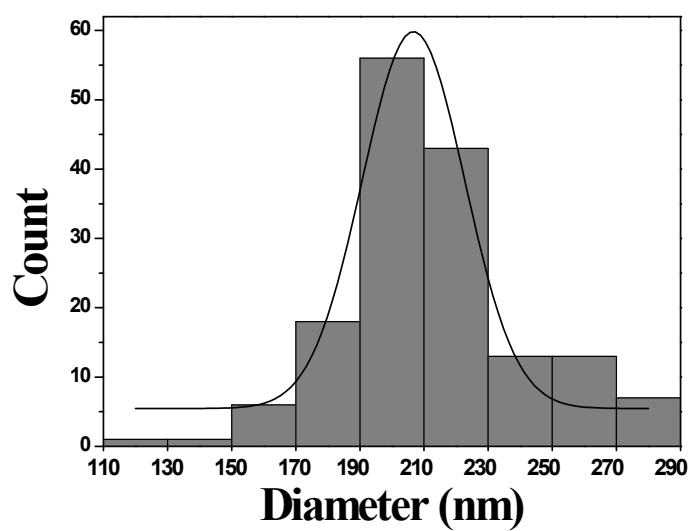

Fig. S5 Particle size distribution of as-synthesized bare silica microspheres.

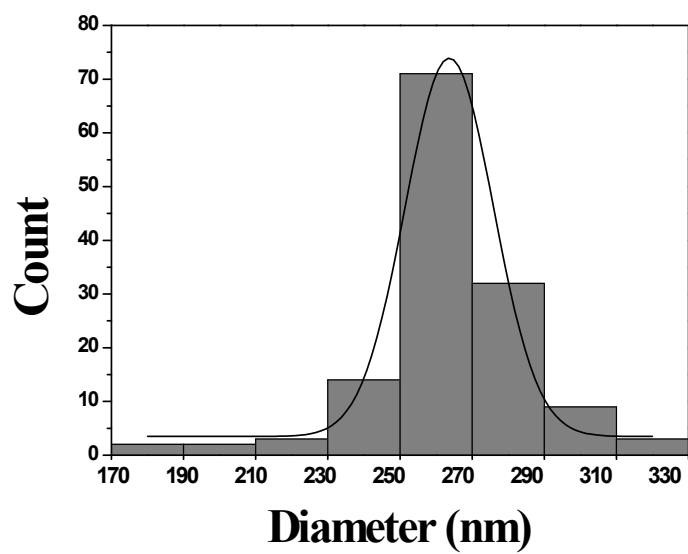

Fig. S6 Particle size distribution of as-synthesized  $\text{SiO}_2@Ln\text{-dpa}$ .

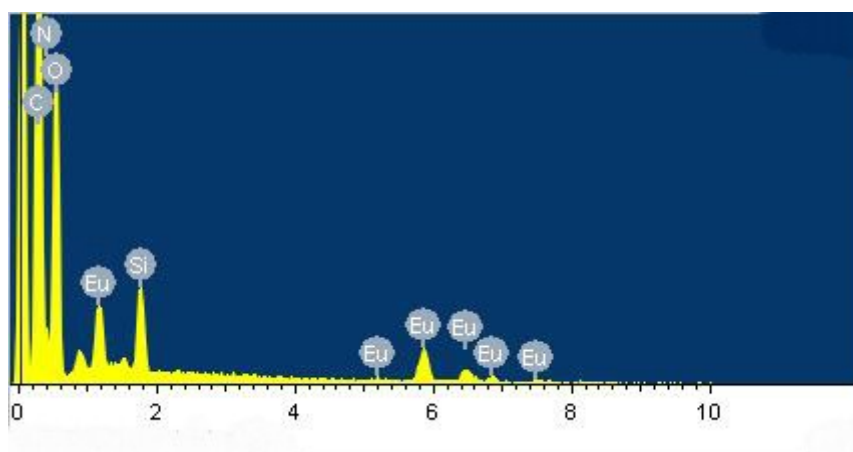

Fig. S7 Energy dispersive analysis by X-rays (EDX) spectroscopy of  $\text{SiO}_2@Eu\text{-dpa}$ .

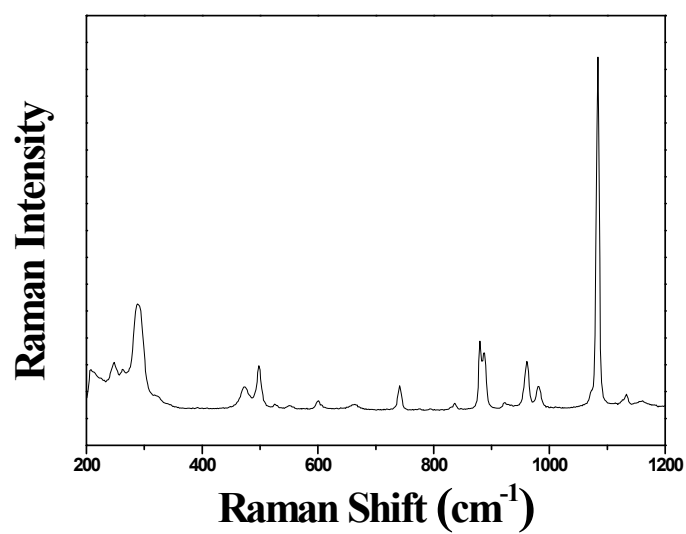

Fig. S8 Raman spectra of **SiO<sub>2</sub>@Ln-dpa**.

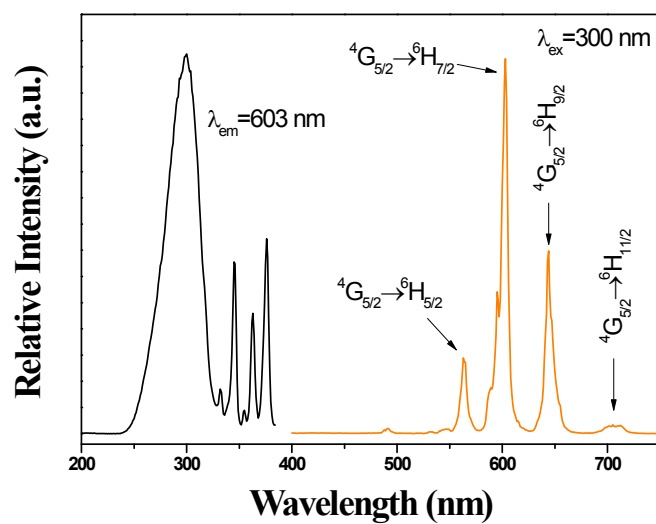

Fig. S9 Excitation spectrum and emission spectrum of **SiO<sub>2</sub>@Sm-dpa**.

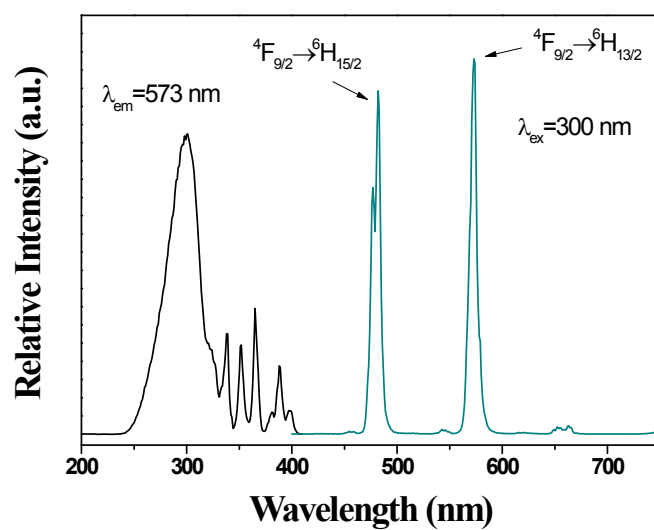

Fig. S10 Excitation spectrum and emission spectrum of  $\text{SiO}_2\text{@Dy-dpa}$ .

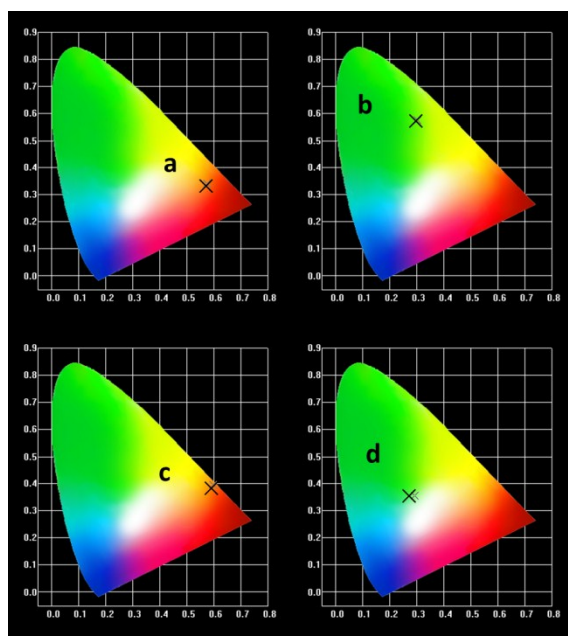

Fig. S11 CIE chromaticity diagram of (a)  $\text{SiO}_2\text{@Eu-dpa}$ ; (b)  $\text{SiO}_2\text{@Tb-dpa}$ ; (c)  $\text{SiO}_2\text{@Sm-dpa}$ ; (d)  $\text{SiO}_2\text{@Dy-dpa}$ .

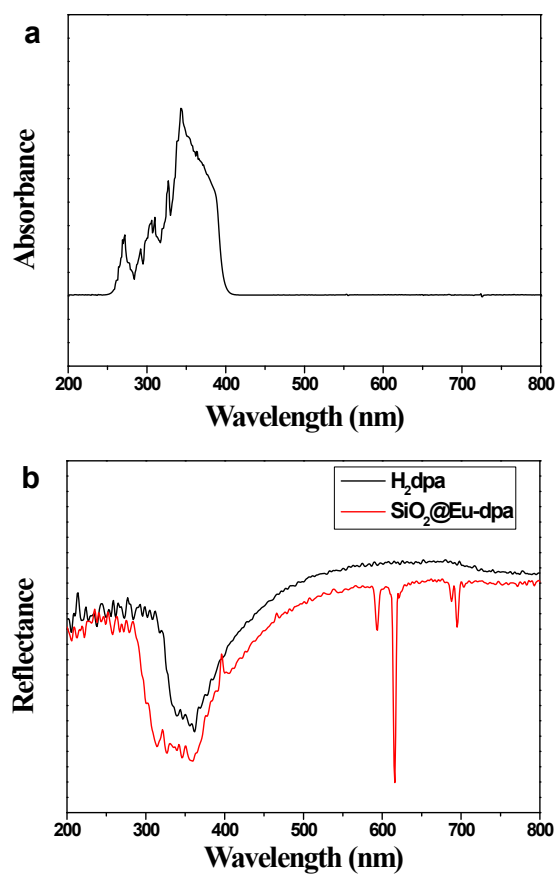

Fig. S12 (a) UV-vis absorption spectroscopy of acetone; (b) ultraviolet diffuse-reflectance spectra of H<sub>2</sub>dpa and SiO<sub>2</sub>@Eu-dpa.

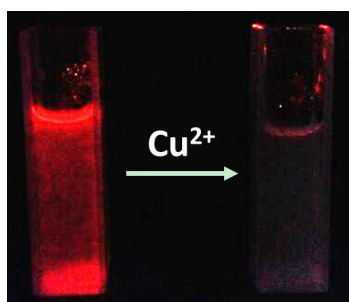

Fig. S13 Photograph of the luminescence change after addition of Cu<sup>2+</sup> in SiO<sub>2</sub>@Eu-dpa suspension under UV light.



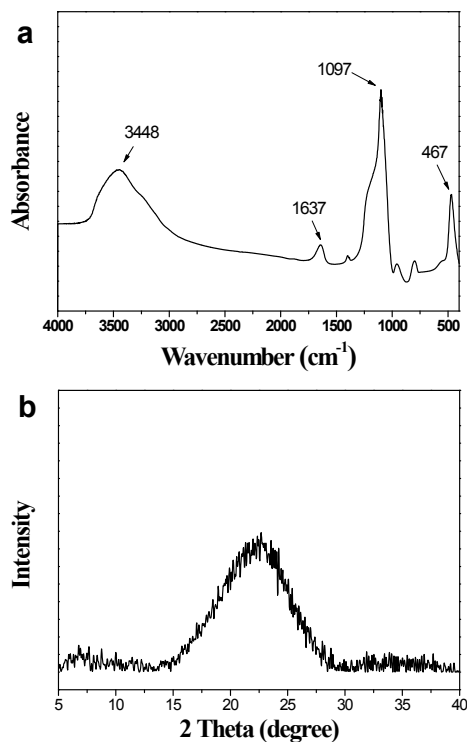

Fig. S14 FTIR spectra (a) and PXRD pattern (b) of the core-shell structure materials after treated with Cu<sup>2+</sup>.

Table S1. The luminescent data of as-synthesized materials.

|                               | <i>Lifetime</i> | <i>Total quantum yield</i> | <i>Excitation wavelength</i> |
|-------------------------------|-----------------|----------------------------|------------------------------|
| Eu-dpa                        | 1882 $\mu$ s    | 34.1%                      | 293 nm                       |
| Tb-dpa                        | 1663 $\mu$ s    | 23.5%                      | 295 nm                       |
| SiO <sub>2</sub> @Eu-dpa      | 2398 $\mu$ s    | 45.7%                      | 300 nm                       |
| SiO <sub>2</sub> @Tb-dpa      | 2066 $\mu$ s    | 30.4%                      | 300 nm                       |
| SiO <sub>2</sub> @(Eu:Tb)-dpa | 2358 $\mu$ s    | 38.2%                      | 290 nm                       |
| SiO <sub>2</sub> @(Dy:Eu)-dpa | 2066 $\mu$ s    | 28.1%                      | 300 nm                       |
